# Supplementary material for: Cytological study on the regulation of lymphocyte homing in the chicken spleen during LPS stimulation
Source: PubMed Central journal article supplement (PMC5352331; doi:10.18632/oncotarget.14502), 2017-01-04
Supplement: oncotarget-08-7405-s001.pdf [file oncotarget-08-7405-s001.pdf]

## Cytological study on the regulation of lymphocyte homing in the chicken spleen during LPS stimulation

Qian Zhang<sup>1,2</sup>, Yasir Waqas<sup>1</sup>, Ping Yang<sup>1</sup>, Xuejing Sun<sup>1</sup>, Yi Liu<sup>1</sup>, Nisar Ahmed<sup>1</sup>, Bing Chen<sup>1</sup>, Quanfu Li<sup>1</sup>, Lisi Hu<sup>1</sup>, Yufei Huang<sup>1</sup>, Hong Chen<sup>1</sup>, Bing Hu<sup>3</sup> and Qiusheng Chen<sup>1</sup>

<sup>1</sup>Laboratory of Animal Cell Biology and Embryology, College of Veterinary Medicine, Nanjing Agricultural University, Nanjing, China

<sup>2</sup>Key Laboratory of Antibody Techniques of Ministry of Health, Nanjing Medical University, Nanjing, China

<sup>3</sup>Biological experiment and Teaching Center, College of Life Sciences, Nanjing Agricultural University, Nanjing, China

**Correspondence to:** Qiusheng Chen, **email:** chenqsh305@njau.edu.cn

**Keywords:** lymphocyte homing; chicken spleen; HEV; sheathed capillary; adhesion molecules; Immunology and Microbiology Section, Immune response, Immunity

**Received:** May 22, 2016

**Accepted:** December 27, 2016

**Published:** January 04, 2017

**Supplementary Table 1: Primer sequences used in the qPCR analysis**

| Gene                | GenBank accession number | Forward Primer<br>Reverse Primer              | Amplicon length (bp) |
|---------------------|--------------------------|-----------------------------------------------|----------------------|
| Integrin $\alpha$ 4 | XM421974                 | CAGAGAATACCAGCACAG<br>CACAGCAGAATCGGATAG      | 132                  |
| Integrin $\beta$ 1  | XM015281260              | TCTCTGTTGCTTGATATGG<br>TGTTGGTTCTCCTTCTTG     | 151                  |
| VCAM-1              | XM422310                 | TGTGAAGTAGTTAATCCTGTA<br>CTGAGCAAGAGATGGTAA   | 145                  |
| MADCAM-1            | XM003642866              | CACAGGGGCGGATCTTACAG<br>GTCTTGCTTGGAACGTGTGC  | 100                  |
| ILK                 | XM015280909              | GGGACAACTTCGTGGTGGA<br>CCTTGCAGTCATGCCTCGT    | 153                  |
| AKT                 | NM205055                 | CCAAGAGACATTCCTCGCCAT<br>CGGTCGTTCCCTGTAGCCAA | 147                  |
| $\beta$ -actin      | NM205518                 | CCTGAACCTCTCATTGCCA<br>CCTGAACCTCTCATTGCCA    | 152                  |
